# Supplementary material for: The impact of lipoprotein lipase deficiency on health-related quality of life: a detailed, structured, qualitative study
Source: Springer Nature journal article supplement (doi:10.1186/s13023-017-0706-1), 2017-09-19

**Patient 1**

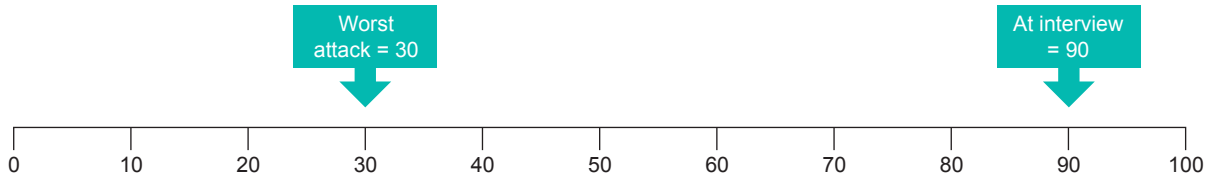

**Patient 2**

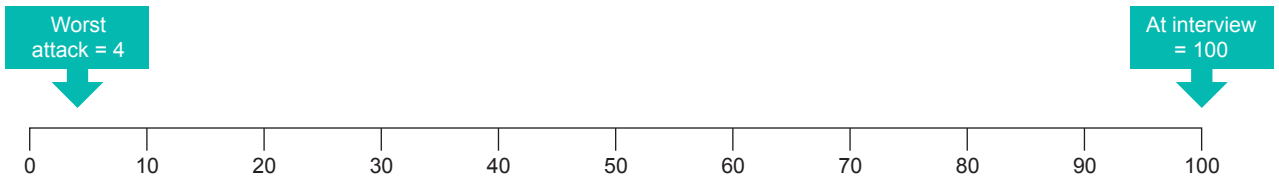

**Patient 3**

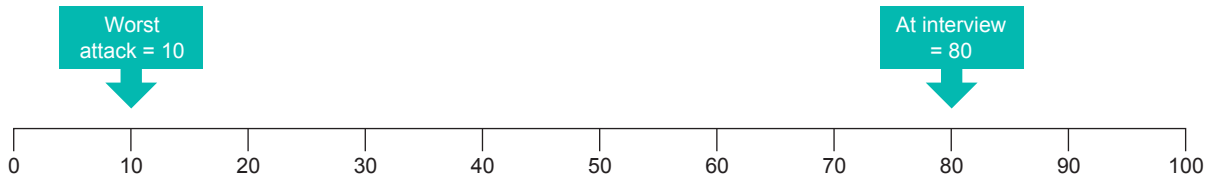

Supplement: MOESM1 [file 15071296]
